# Supplementary material for: Phosphorylcholine micelles decorated by hyaluronic acid for enhancing antitumor efficiency
Source: Royal Society of Chemistry journal article supplement (doi:10.1039/c6py02032a), 2017-01-01
Supplement: c6py02032a1.pdf [file c6py02032a1.pdf]

# Supporting information

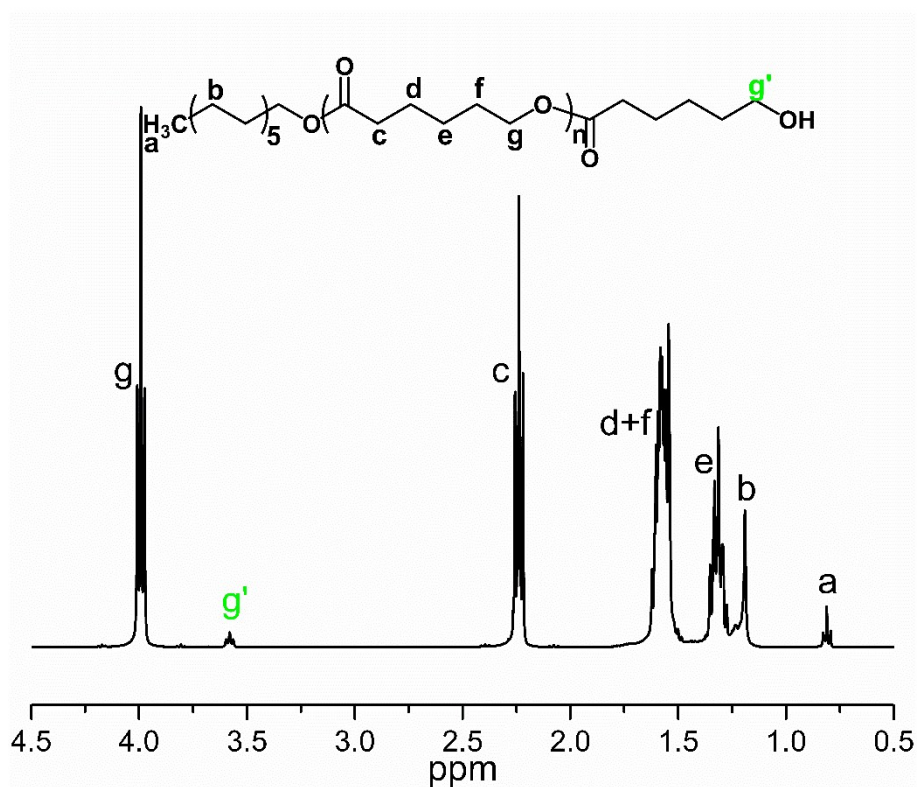

Fig.S1  $^1\text{H}$  NMR of PCL.

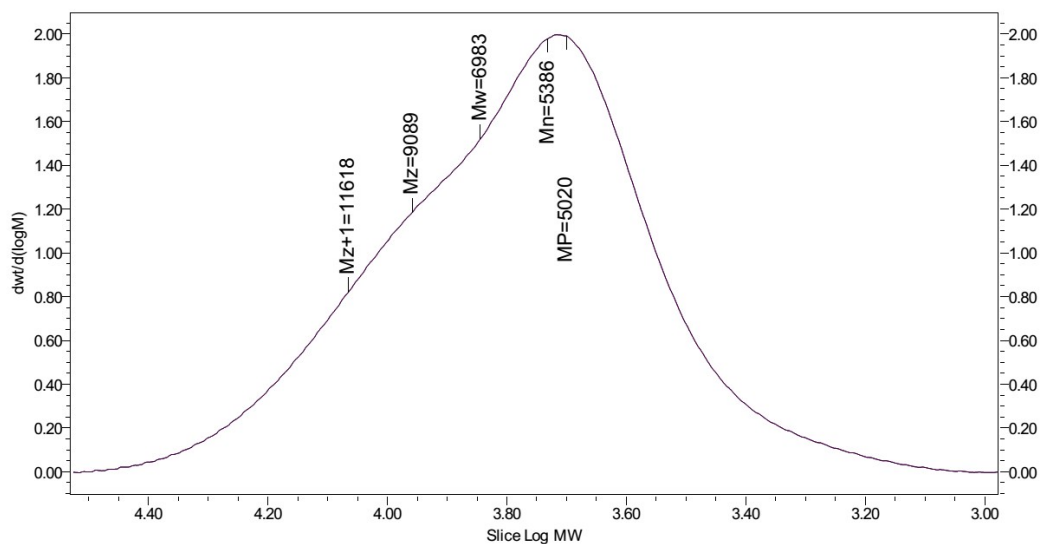

Fig.S2 GPC test pattern of PCL. (The molecular weight and polydispersity of the copolymers were determined by a gel permeation chromatograph instrument system (Waters 1515). The measurements were performed using THF as the eluent at a flow rate of 0.6 mL/min at 40 °C and a series of narrow polystyrene standards for the calibration of the columns.)

Table S1 The molecular weight of PCL obtains by GPC analysis.

| Item | Mn(Da) | Mw(Da) | MP   | Mz(Da) | Mz+1(Da) | PDI  | Mz/Mw | Mz+1/Mw |
|------|--------|--------|------|--------|----------|------|-------|---------|
| Data | 5400   | 7000   | 5000 | 9100   | 11600    | 1.30 | 1.30  | 1.66    |

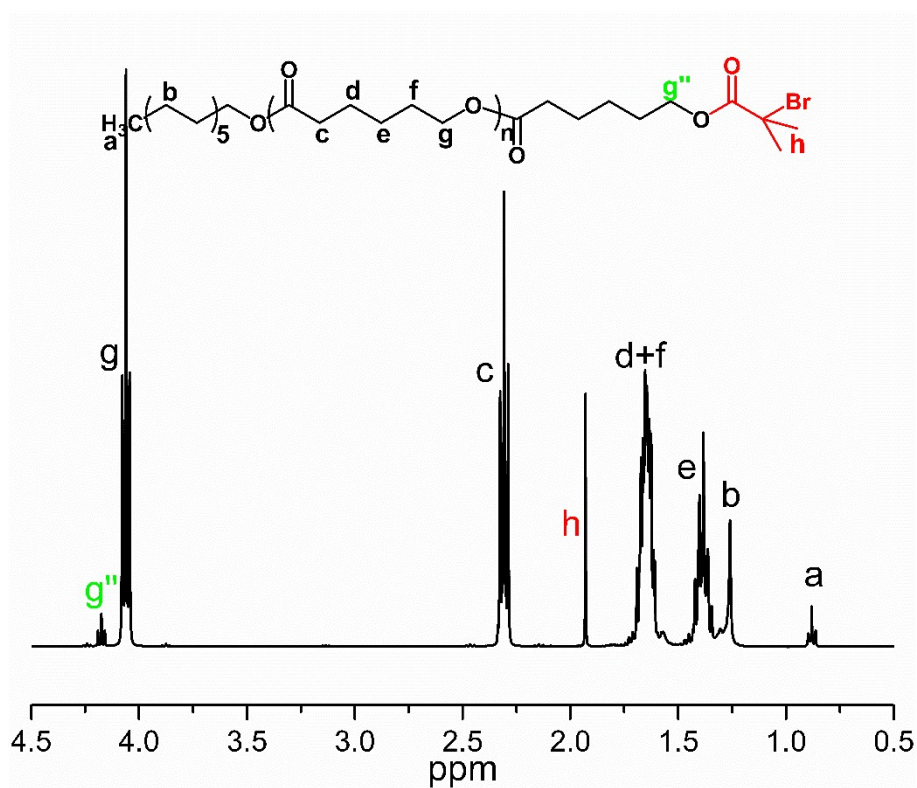

Fig.S3 <sup>1</sup>H NMR of PCL-Br.

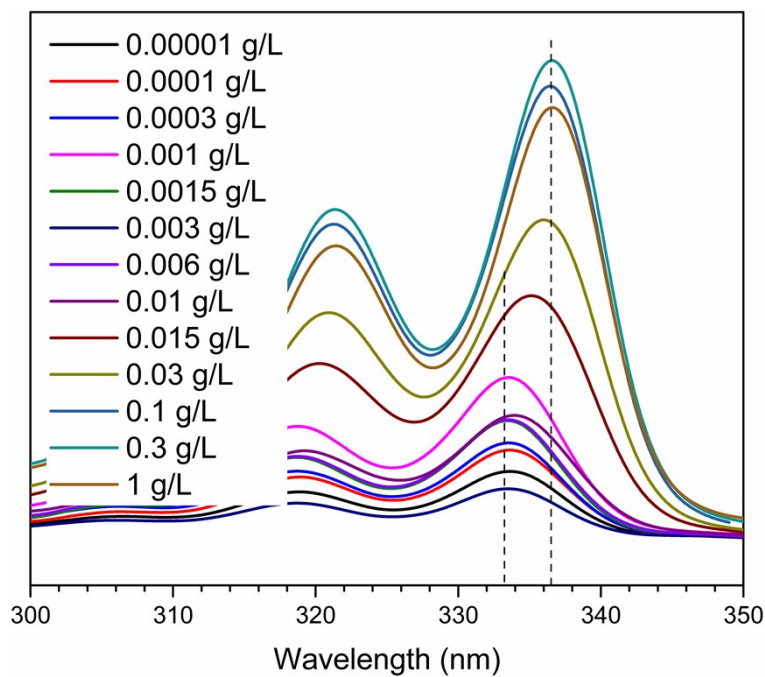

Fig.S4 Fluorescence excitation spectra of pyrene/PCL-PDEAMPC against concentration of PCL-PDEAMPC micelles in distilled water (emission wavelength: 390 nm).

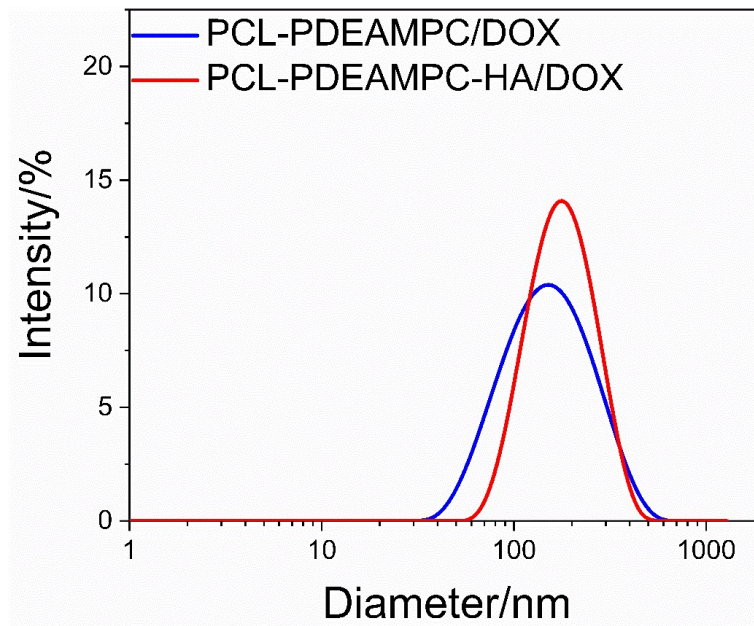

Fig.S5 Intensity vs. diameter of DOX-loaded micelles.

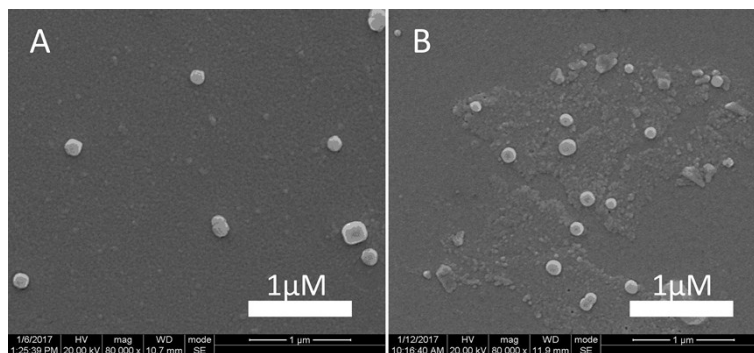

Fig.S6 Scanning electron microscope (SEM) images of DOX-loaded micelles (A: PCL-PDEAMPC/DOX; B: PCL-PDEAMPC-HA/DOX).

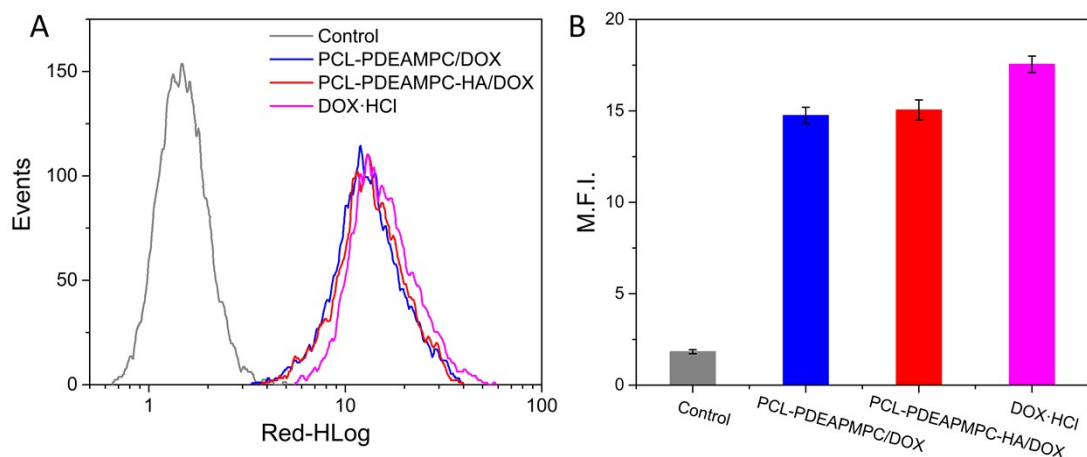

Fig.S7 Flow cytometry analyses (A) and the mean fluorescence intensity (B) of 4T1 cells incubation with PCL-PDEAMPC- HA/DOX micelles and free DOX for 2 h.
